# Supplementary material for: Inactivation of MGMT is Associated With the Efficacy of Streptozocin and High-grade Pancreatic Neuroendocrine Neoplasms
Source: Research Square preprint supplement (doi:10.21203/rs.3.rs-2161835/v2), 2023-02-14
Supplement: Supplementary file 1 [file f1e0bb5d2b07bee95e4b8634.docx]

**Supplementary Figure S1**

**
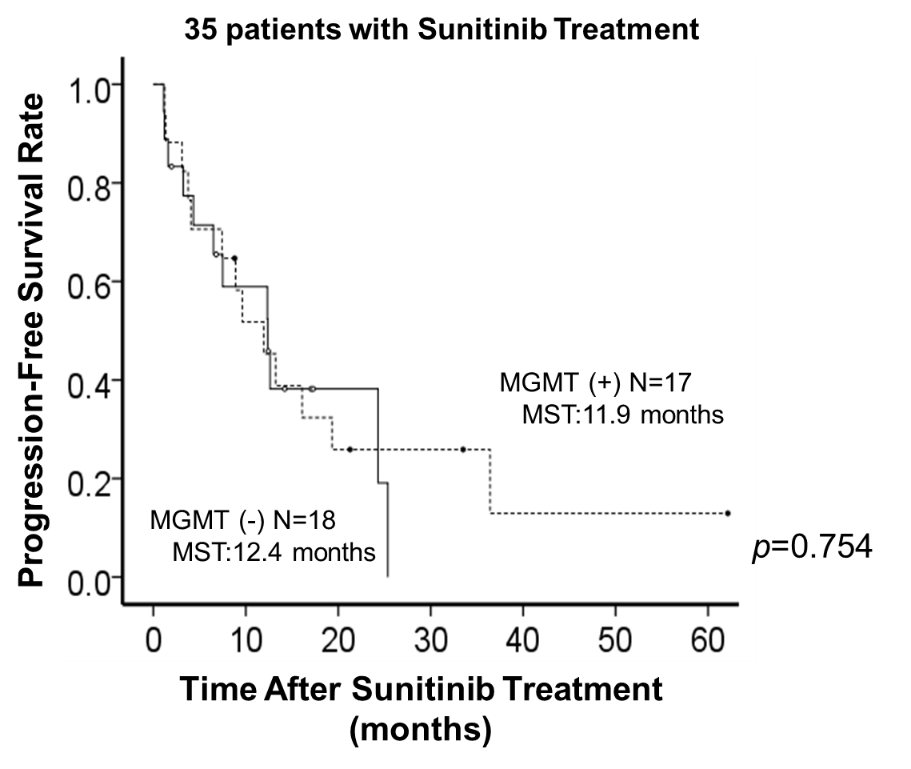
**

**Supplementary Figure S1**.Progression-free survival from the start of sunitinib treatment in 35 patients with positive and negative MGMT expression. Statistical significance was determined by log-rank test.
